# Supplementary material
Source: PubMed Central journal article supplement (PMC3513540)

Supplemental Table 1: eGFR multivariate regression

| <b>Predictor</b>                          | <b>Coefficient (95% CI)</b> | <b>p</b> |
|-------------------------------------------|-----------------------------|----------|
| Age (years)                               | -0.64 (-0.39 to -0.89)      | <0.001   |
| Duration of disease (years)               | -0.28 (-0.02 to -0.53)      | 0.032    |
| Observed time with calcium >9.5 mg/dL (%) | -0.44 (-0.14 to -0.74)      | 0.005    |

Supplemental Figure 1: Univariate correlations of eGFR with age, duration of disease, proportion of time with serum calcium >9.5 mg/dL,  $avg_{tw}$  serum calcium,  $avg_{tw}$  serum phosphorus, and average calcium-phosphorus product. Ca, calcium;  $P_i$ , phosphate.

### Supplemental Figure 1

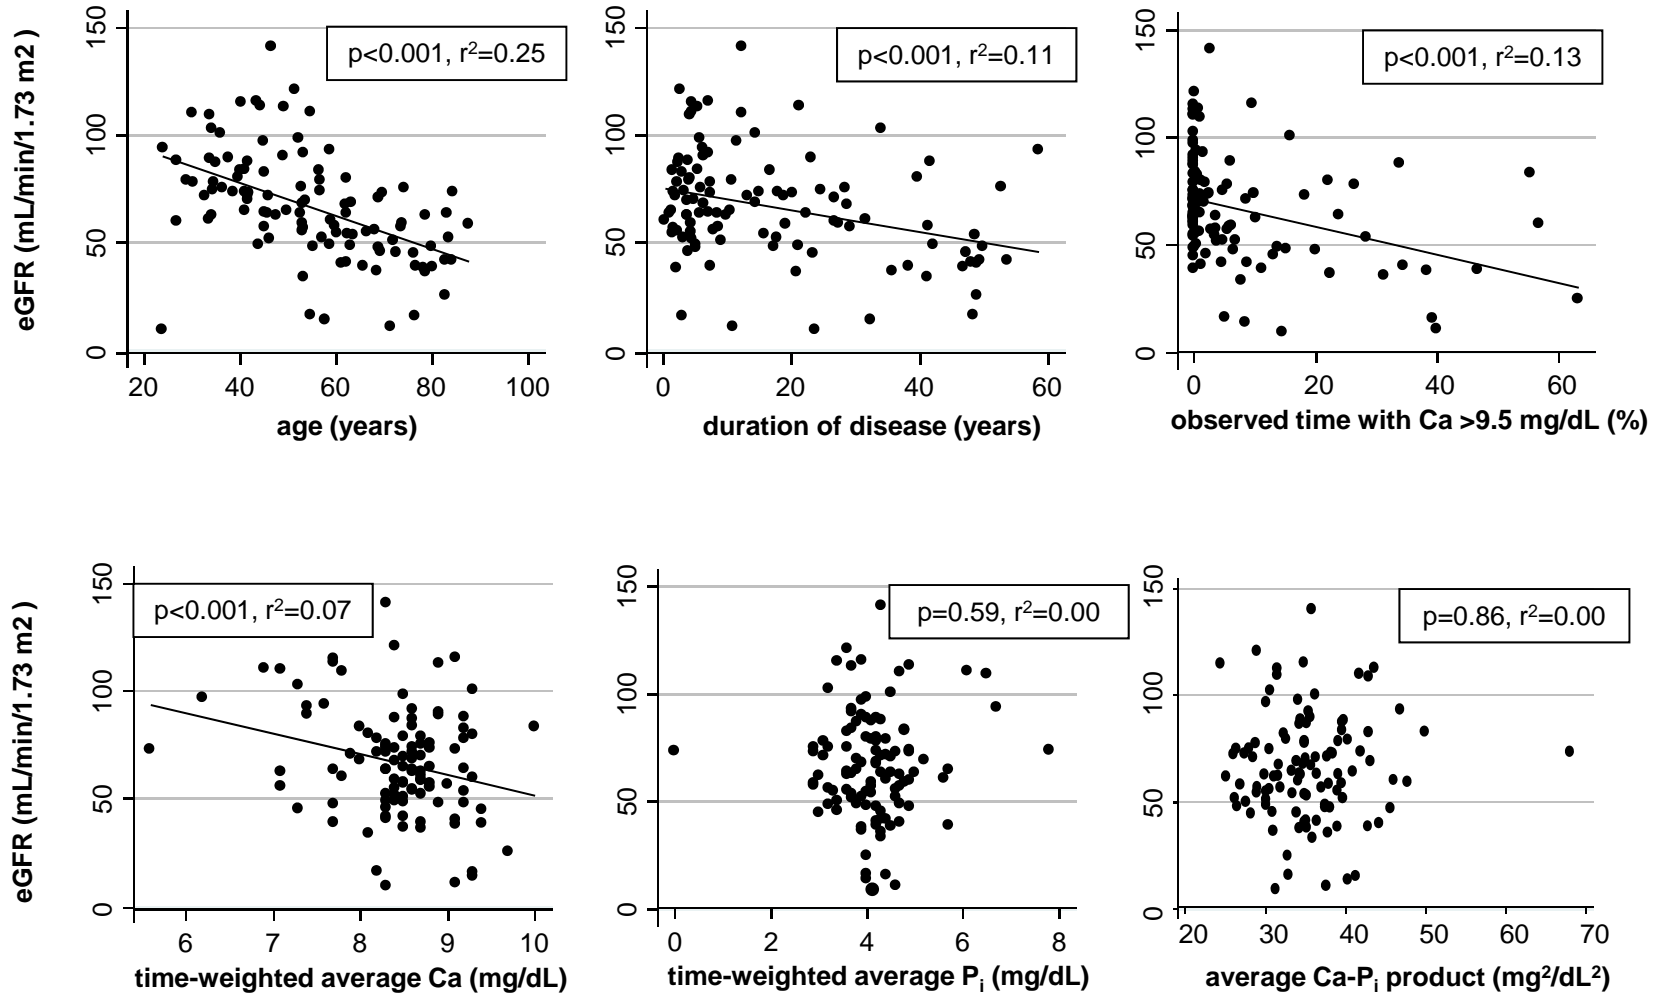

Supplement: supp_jc.2012-1808v1_JC-12-1808supptab1fig1.pdf [file supp_jc.2012-1808v1_JC-12-1808supptab1fig1.pdf]
